# Supplementary material for: The role of macrophages in the susceptibility of Fc gamma receptor IIb deficient mice to Cryptococcus neoformans
Source: PubMed Central journal article supplement (PMC5225418; doi:10.1038/srep40006), 2017-01-11
Supplement: srep40006-s1.pdf [file srep40006-s1.pdf]

**Manuscript title:** The role of macrophages in the susceptibility of Fc gamma receptor IIb deficient mice to *Cryptococcus neoformans*

**Author list:** Saowapha Surawut, Thunnicha Ondee, Sujittra Taratummarat, Tanapat Palaga, Prapaporn Pisitkun, Ariya Chindamporn, Asada Leelahavanichkul

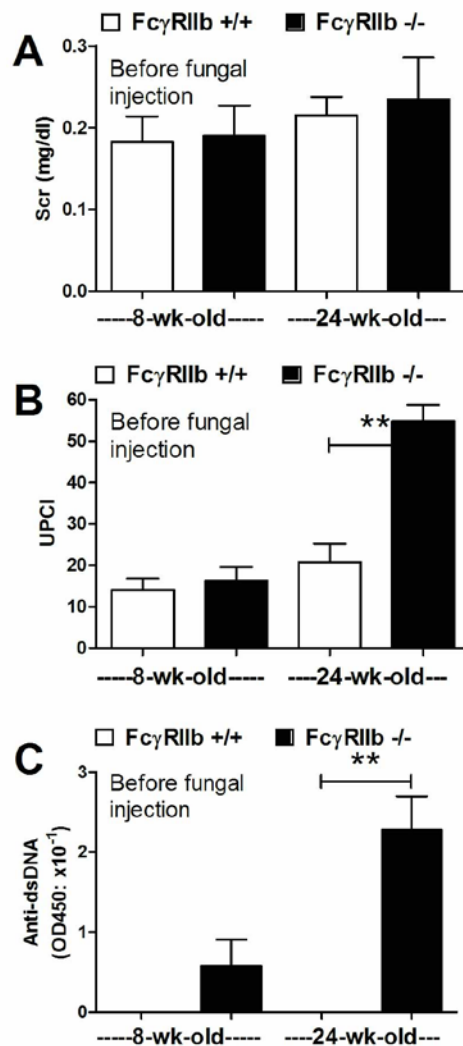

**Supplementary Figure S1.** Characteristics of Fc $\gamma$ RIIb<sup>-/-</sup> mice at 8- and 24-weeks-old as demonstrated by serum creatinine (Scr) (A), proteinuria by urine protein creatinine index (UPCI) (B) and anti-dsDNA (C), (n=4-5/group). The data are shown as the mean  $\pm$  SE, and the presented values are combined from 2-3 independent experiments. \*  $p < 0.05$ , \*\*  $p < 0.01$ .

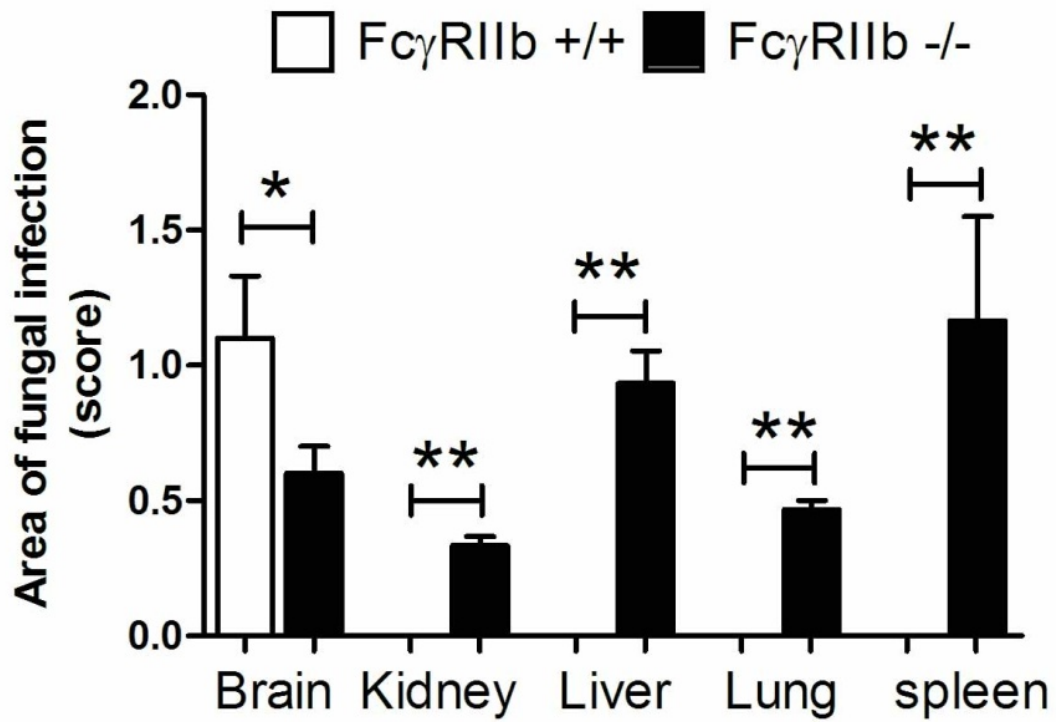

**Supplementary Figure S2.** The quantitative histology scoring of Figure 2 is graphically demonstrated (n=4-5/group). \*  $p < 0.05$ , \*\*  $p < 0.01$ .

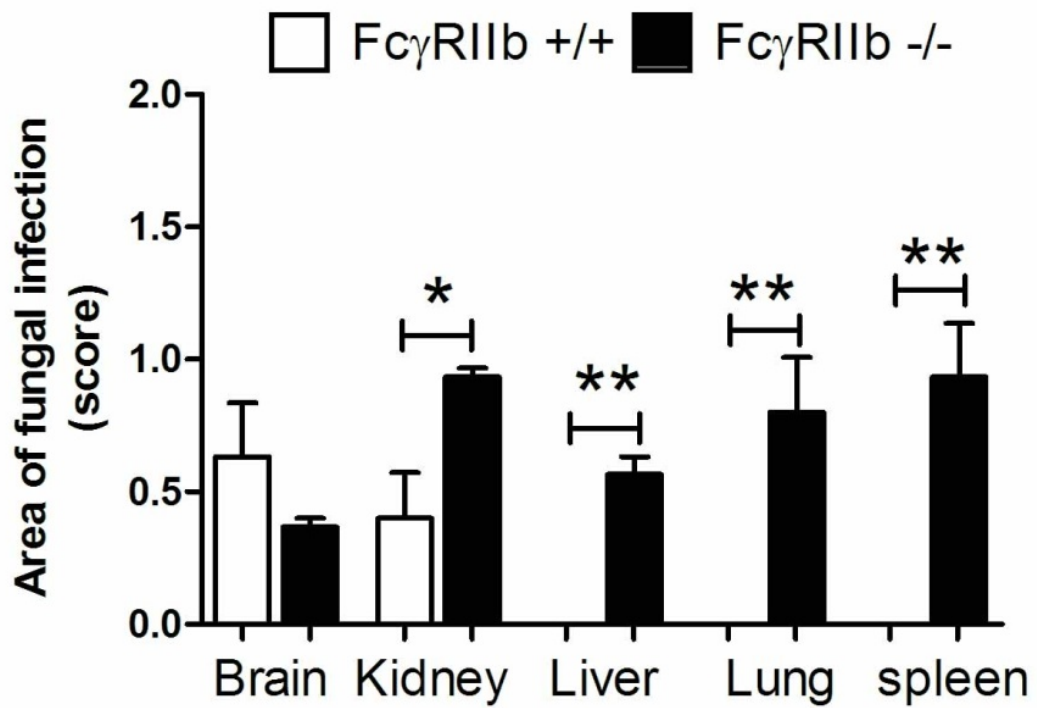

**Supplementary Figure S3.** The quantitative histology scoring of Figure 5 is graphically demonstrated (n=4-5/group). \*  $p < 0.05$ , \*\*  $p < 0.01$ .

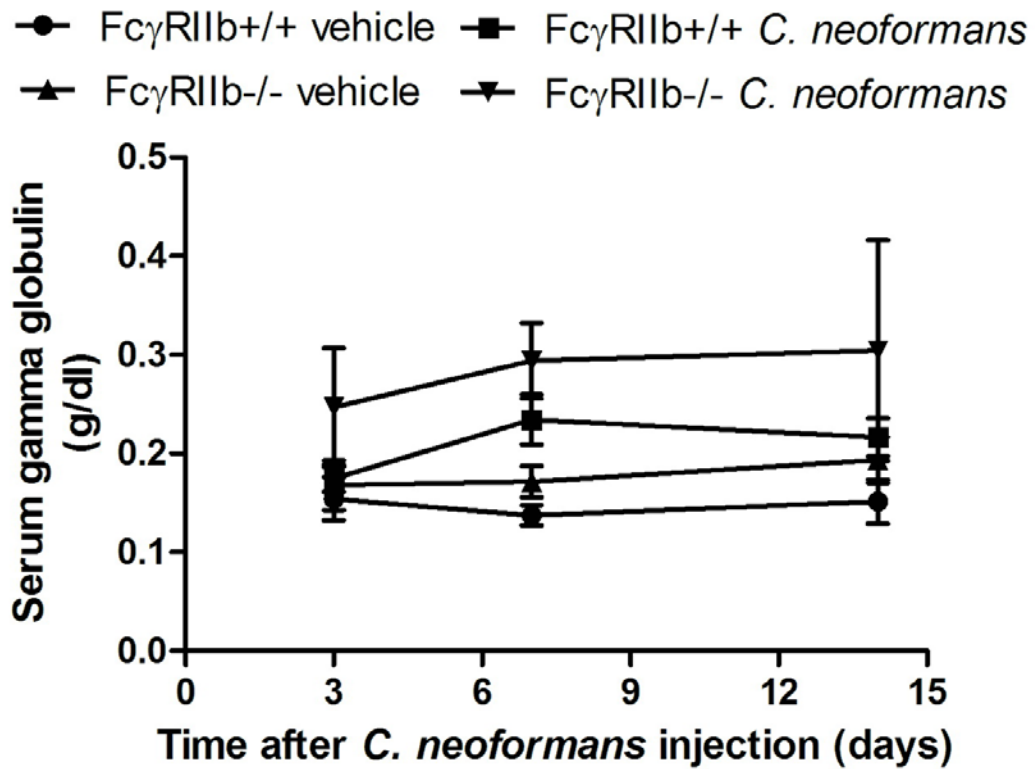

**Supplementary Figure S4.** The analysis of gamma globulin protein from capillary protein electrophoresis after *C. neoformans* injection is shown (n=4-6/group, the experiment was performed in 2 independent experiments). \*  $p < 0.05$ .

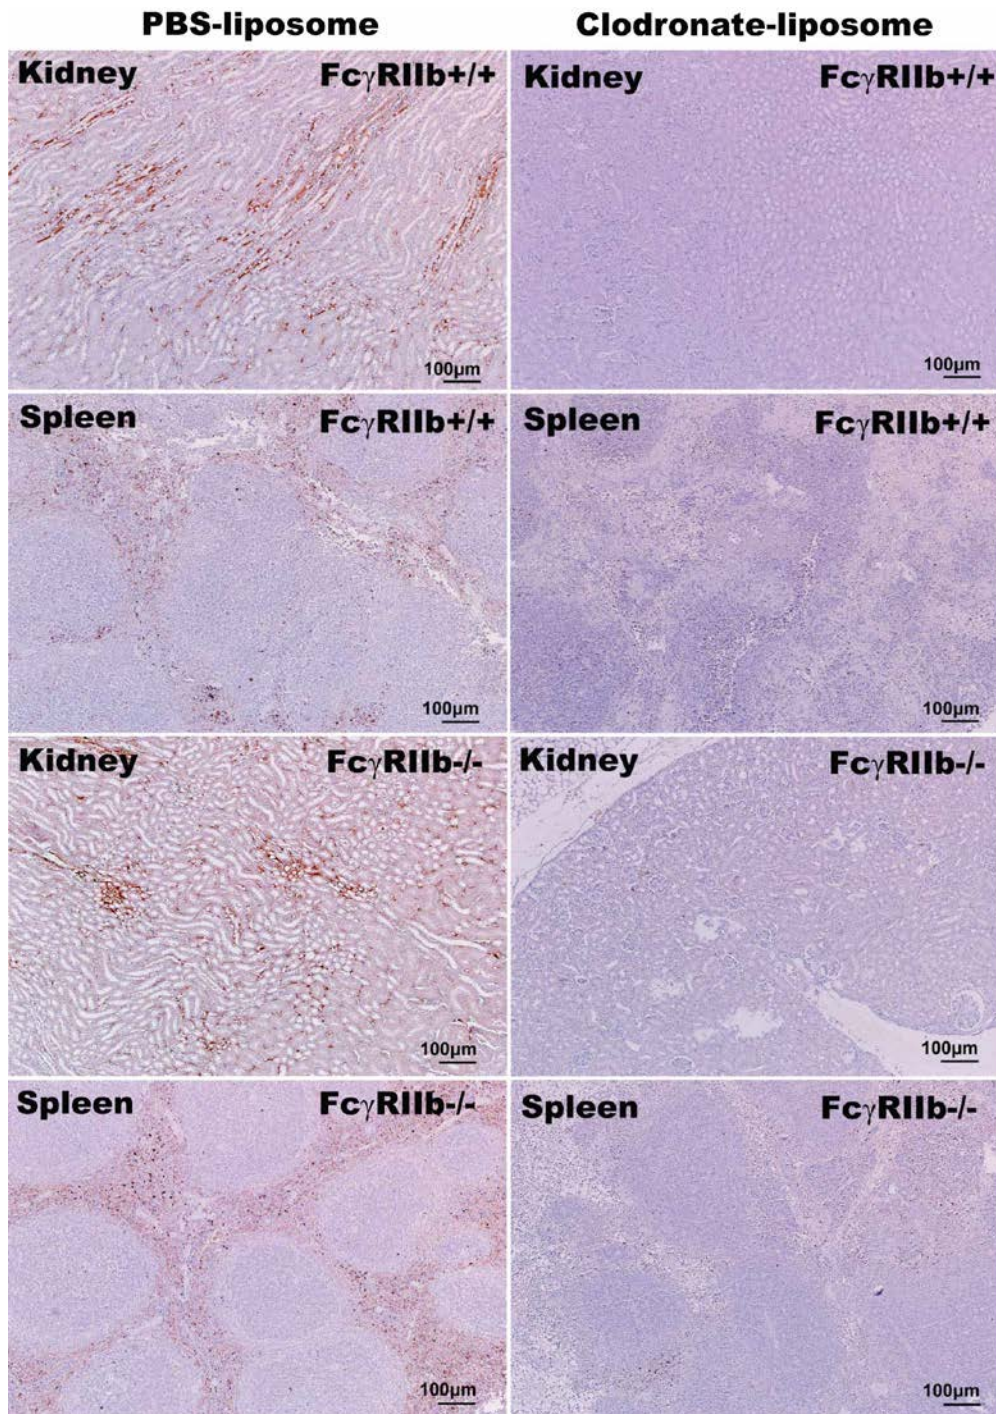

**Supplementary Figure S5.** Representative immunohistochemistry analysis of macrophages stained with F4/80 from Fc $\gamma$ RIIb+/+ and Fc $\gamma$ RIIb-/- with and without clodronate administration is shown. (Only spleens and kidneys were selected as representative organs)

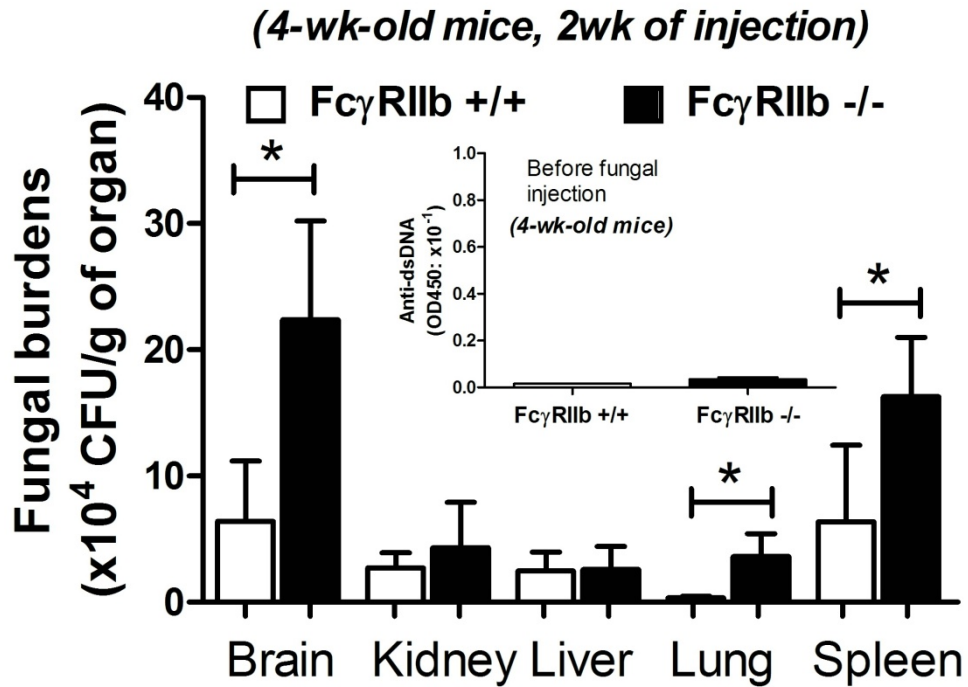

**Supplementary Figure S6.** Fungal burdens in the internal organs of 4-week-old at 2 weeks after *C. neoformans* administration and anti-dsDNA of FcγRIIb<sup>+/+</sup> and FcγRIIb<sup>-/-</sup> mice at 4-weeks-old. The data are shown as the mean ± SE (n = 4-5/group). \*  $p < 0.05$ .
